# Supplementary material
Source: publisher figshare collection journal article supplement (https://sage.figshare.com/ndownloader/files/20697384)
Supplement: Supplementary file 1 [file 20697384]

**Supplemental Material**

**Table S1.** Logic grids for database searches

| **Database** | **Motivational Interviewing** | **AND** | **Multiple Sclerosis** | |
| --- | --- | --- | --- | --- |
| PubMed | “motivational interviewing” [mh] OR  “motivation” [mh:noexp] OR  motivational interview* [tw] OR  motivational enhance* [tw] OR  motivational intervention* [tw] OR  motivational training [tw] OR  motivation interview* [tw] OR  motivation enhance* [tw] OR  motivation intervention* [tw] OR  motivation training [tw] |  | | “multiple sclerosis”[mh] OR  multiple sclerosis[tw] OR  disseminated sclerosis[tw] |
| PsycINFO | exp motivational interviewing/ OR  motivation training.sh OR  motivation.sh OR  motivat* interview*.tw OR  motivat* enhance*.tw OR  motivat* intervention*.tw OR  motivat* training.tw |  | | multiple sclerosis.sh OR  multiple sclerosis.tw OR  disseminated sclerosis.tw |
| Embase | “motivational interviewing”:de OR  motivation:de OR  “motivational interviewing” OR  “motivational enhancement” OR  “motivational intervention” OR  “motivational training” OR  “motivation interviewing” OR  “motivation enhancement” OR  “motivation intervention” OR  “motivation training” |  | | “multiple sclerosis”:de OR  “multiple sclerosis” OR  “disseminated sclerosis” |
| Cochrane | Mesh: “motivational interviewing” OR  Motivation OR  “motivational interview” OR  “motivational enhancement”  OR “motivational intervention”  OR “motivational training” |  | | Mesh: “multiple sclerosis” OR  “multiple sclerosis” OR  “disseminated sclerosis” |

**Figure S1.** Risk of bias across studies based on RoB 2.0 [23]

**Table S2** Risk of bias within individual studies based on RoB 2.0 [23]

| Lead author (date) | Randomisation process  (selection bias) | Deviations from intended interventions *assignment to intervention*  (performance bias) | | | Deviations from intended interventions *adhering to intervention*  (performance bias | | Missing outcome data  (attrition bias) | | Measurement of outcomes  (detection bias) | Selection of the reported results (reporting bias) |
| --- | --- | --- | --- | --- | --- | --- | --- | --- | --- | --- |
| Berger (2005) |  |  | | |  | |  | |  |  |
| Bombardier (2008) |  |  | | |  | |  | |  |  |
| Bombardier (2013) |  |  | | |  | |  | |  |  |
| Borji (2018) |  |  | | |  | |  | |  |  |
| Bruce (2016) |  |  | | |  | |  | |  |  |
| Dashti (2016) |  |  | | |  | |  | |  |  |
| Hanssen (2016) |  |  | | |  | |  | |  |  |
| Smith (2012) |  |  | | |  | |  | |  |  |
| Turner (2014) |  |  | | |  | |  | |  |  |
| Turner (2016) |  |  | | |  | |  | |  |  |
|  |  | |  | |  | |  | |  | | | |  | |
| Low risk of bias |  |  | |  | |  | |  | | | |  | |
| Some concerns |  |  | |  | |  | |  | | | |  | |

**Table S3.** Immediate (baseline to post-intervention) effects associated with motivational interviewing

| Domain | Outcome Measure | Subscale | N | *g* | | | 95% CI | | N*fs* | Format | Medium | |  | Citation |
| --- | --- | --- | --- | --- | --- | --- | --- | --- | --- | --- | --- | --- | --- | --- |
| Fatigue | Fatigue Impact Scale | | 60 | **2.68*** | | | 1.99 | 3.37 | 12 | Group | Face | |  | [35] |
| Mental and Physical Fatigue Scale | Physical | 13  13 | **1.59*** | | | .41 | 2.78 | 7 | Individual | Face | |  | [11] |
| Mental | .59 | | | -.44 | 1.64 | 2 | Individual | Face | |  | [11] |
| Modified Fatigue Impact Scale | Physical | 130 | **.36*** | | | .01 | .71 | 1 | Individual | Face + Phone | |  | [10] |
|  |  | Cognitive | 127 | .23 | | | -.12 | .57 | 0 | Individual | Face + Phone | |  | [10] |
|  |  | Psychosocial | 130 | .12 | | | -.22 | .47 | 0 | Individual | Face + Phone | |  | [10] |
|  |  | Total | 126 | .32 | | | -.03 | .67 | 1 | Individual | Face + Phone | |  | [10] |
|  |  | |  |  | | |  |  |  |  |  | |  |  |
| Activity & exercise | Rating of Perceived Exertion Scale | | 13 | **1.23*** | | | .11 | 2.35 | 5 | Individual | Face | |  | [11] |
| The Feeling Scale | | 13 | 1.11 | | | .01 | 2.21 | 5 | Individual | Face | |  | [11] |
| Health Promoting Lifestyle Profile II | Physical activity | 51 | **.66*** | | | .10 | 1.22 | 2 | Group | Some | |  | [19] |
| 129 | **.62*** | | | .27 | .98 | 2 | Individual | Some | |  | [10] |
| 7-Day Physical Activity Recall | | 92 | **.46*** | | | .05 | .87 | 1 | Individual | Face + Phone | |  | [16] |
| The Enjoyment Scale | | 13 | .36 | | | -.66 | 1.39 | 1 | Individual | Face | |  | [11] |
| Self-selected Walking Speed | | 130 | .31 | | | -.03 | .66 | 1 | Individual | Face + Phone | |  | [10] |
| Leg Ergometer Time | | 124 | .23 | | | -.12 | .58 | 0 | Individual | Face + Phone | |  | [10] |
| Isokinetic Dynamometer | Flexion | 116 | .11 | | | -.26 | .47 | 0 | Individual | Face + Phone | |  | [10] |
| Extension | 116 | .05 | | | -.32 | .41 | 0 | Individual | Face + Phone | |  | [10] |
|  |  |  |  |  | | |  |  |  |  |  | |  |  |
| Diet | Health Promoting Lifestyle Profile II | Nutrition | 51 | **.74*** | | | .18 | 1.29 | 3 | Group | Face | |  | [19] |
|  |  |  |  |  | | |  |  |  |  |  | |  |  |
| Depression | Hamilton Depression Rating Scale | | 92  92  92 | **1.12*** | | | .69 | 1.56 | 5 | Individual | Face + Phone | |  | [16] |
| Structured Clinical Interview for DSM-IV | | **.65*** | | | .24 | 1.06 | 2 | Individual | Face + Phone | |  | [16] |
| Hopkins Symptom Checklist-20 | | **.53*** | | | .12 | .94 | 2 | Individual | Face + Phone | |  | [16] |
| Hopkins Symptom Checklist-25 | | 119 | **.37*** | | | .01 | .73 | 1 | Individual | Face + Phone | |  | [20] |
|  |  | |  |  | | |  |  |  |  |  | |  |  |
| Motivation | Motivation for Behaviour Change | | 71 | **.92*** | | | .44 | 1.41 | 4 | Individual | Phone | |  | [32] |
|  |  | |  | |  |  |  |  |  |  |  | |  |  |
| Self-efficacy | Adherence Self-efficacy | | 19 | .91 | | | -.03 | 1.85 | 4 | Individual | Phone | |  | [21] |
| Health Promoting Lifestyle Profile II | Responsibility | 51 | **.64*** | | | .09 | 1.19 | 2 | Group | Face | |  | [19] |
| 129 | .26 | | | -.09 | .61 | 0 | Individual | Face + Phone | |  | [10] |
| Confidence in Behaviour Change | | 71 | -.24 | | | -.70 | .22 | 0 | Individual | Phone | |  | [32] |
|  |  | |  |  | | |  |  |  |  |  | |  |  |
| Coping | Health Promoting Lifestyle Profile II | Stress management | 51 | **.70*** | | | .14 | 1.25 | 3 | Group | Face | |  | [19] |
| 129 | **.41*** | | | .07 | .76 | 1 | Individual | Face + Phone | |  | [10] |
| Spiritual growth | 51 | .23 | | | -.31 | .77 | 0 | Group | Face | |  | [19] |
|  | 129 | **.50*** | | | .15 | .85 | 2 | Individual | Face + Phone | |  | [10] |
|  |  |  |  | |  |  |  |  |  |  |  |  | | | |  |
| Relationships | Health Promoting Lifestyle Profile II | Interpersonal | 51 | **.57*** | | | .02 | 1.13 | 2 | Group | Face | |  | [19] |
| 129 | .11 | | | -.23 | .46 | 0 | Individual | Face + Phone | |  | [10] |
| Modified Social Support Scale | | 130 | .26 | | | -.08 | .60 | 0 | Individual | Face + Phone | |  | [10] |

**Table S3.** (cont.)

| Domain | Outcome Measure | Subscale | N | *g* | 95% CI | | N*fs* | Format | | Medium | |  | Citation | |
| --- | --- | --- | --- | --- | --- | --- | --- | --- | --- | --- | --- | --- | --- | --- |
| Cognition | Trail Making Test | Part A | 130 | -.24 | -.58 | .11 | 0 | Individual | | Face + Phone | |  | [10] | |
| Part B | 130 | .23 | -.12 | .57 | 0 | Individual | | Face + Phone | |  | [10] | |
| Behaviour Rating Inventory of Executive Function | Executive function | 119  119 | .02 | -.34 | .38 | 0 | Individual | | Face + Phone | |  | [20] | |
| Metacognition index | .01 | -.35 | .37 | 0 | Individual | | Face + Phone | |  | [20] | |
|  |  | |  |  |  |  |  |  | |  | |  |  | |
| Treatment engagement | Re-initiation of disease modifying therapies | | 71 | .45 | -.01 | .92 | 1 | Individual | | Phone | |  | [32] | |
| Medication Adherence | | 366 | **.34*** | .14 | .55 | 1 | Individual | | Phone | |  | [15] | |
| Medication Adherence | | 19 | .21 | -.68 | 1.10 | 0 | Individual | | Phone | |  | [21] | |
| Healthcare Engagement | | 71 | .17 | -.38 | .73 | 0 | Individual | | Phone | |  | [32] | |
| Exercise Adherence | | 13 | -.16 | -1.17 | .86 | 0 | Individual | | Face | |  | [11] | |
|  |  |  |  |  |  |  |  |  | |  | |  |  | |
| Global | Medical Outcomes Study SF-36 | Mental | 130 | .32 | -.02 | .67 | 1 | Individual | | Face + Phone | |  | [10] | |
| Physical | 130 | .23 | .58 | .11 | 0 | Individual | | Face + Phone | |  | [10] | |
| Health Promoting Lifestyle Profile II | Total | 51 | **1.03*** | .45 | 1.60 | 4 | Group | | Face | |  | [19] | |
| 129 | **.59*** | .24 | .95 | 2 | Individual | | Face + Phone | |  | [10] | |
| MS-Related Symptom Checklist | | 92 | **.48*** | .07 | .89 | 2 | Individual | | Face + Phone | |  | [16] | |
| Multiple Sclerosis Impact Scale-29 | Psychological | 119 | .33 | -.03 | .69 | 1 | Individual | | Face + Phone | |  | [20] | |
| Craig Handicap Assessment and Reporting Technique |  | 130 | .13 | -.21 | .47 | 0 | Individual | | Face + Phone | |  | [10] | |
| MS Functional Composite | | 127 | .13 | -.27 | .48 | 0 | Individual | | Face + Phone | |  | [10] | |
|  |  | |  |  |  |  |  | |  | |  | |  |  | |

N= number of participants providing this data; *g* = standardised mean difference (Hedges’ g),CI = 95% confidence interval (lower and upper limits), N*fs*= fail safe N.

* denotes a significant group difference (*p* < .05). Positive values indicate greater gains (improvement) in motivational interviewing group.

**Table S4.** Sustained (baseline to follow-up) effects associated with motivational interviewing

| Domain | Outcome Measure | Subscale | N | Time | *g* | 95% CI | | N*fs* | Format | Medium |  | Citation |
| --- | --- | --- | --- | --- | --- | --- | --- | --- | --- | --- | --- | --- |
| Fatigue | Modified Fatigue Impact Scale | | 63  63 | 12 | **.72*** | .22 | 1.23 | 3 | Individual  Individual | Phone  Phone |  | [36]  [36] |
| 24 | **.78*** | .27 | 1.28 | 3 |  |
|  |  |  |  |  |  |  |  |  |  |  |  |  |
| Activity & exercise | Health Promoting Lifestyle Profile II | Physical activity | 51 | 4 | **.60*** | .05 | 1.15 | 2 | Group | Face |  | [19] |
| Godin Leisure-Time Exercise Questionnaire | | 63  63 | 12 | **.54*** | .04 | 1.03 | 2 | Individual  Individual | Phone  Phone |  | [36]  [36] |
| 24 | **.97*** | .45 | 1.48 | 4 |  |
|  |  |  |  |  |  |  |  |  |  |  |  |  |
| Diet | Health Promoting Lifestyle Profile II | Nutrition | 51 | 4 | **.72*** | .16 | 1.28 | 3 | Group | Face |  | [19] |
|  |  | |  |  |  |  |  |  |  |  |  |  |
| Depression | Hopkins Symptom Checklist-25 | | 119 | 28 | .10 | -.25 | .46 | 0 | Individual | Face + Phone |  | [20] |
| Patient Health Questionnaire-9 | | 63 | 12 | .48 | -.02 | .98 | 1 | Individual | Phone |  | [36] |
| 63 | 24 | **.87*** | .36 | 1.39 | 3 | Individual | Phone |  | [36] |
|  |  | |  |  |  |  |  |  |  |  |  |  |
| Motivation | Motivation for Behaviour Change | | 71  71 | 10  10 | **.84*** | .36 | 1.33 | 3 | Individual  Individual | Phone  Phone |  | [32]  [32] |
| Brief Motivation Scale | | **.67*** | .20 | 1.15 | 2 |  |
|  |  | |  |  |  |  |  |  |  |  |  |  |
| Self-efficacy | Treatment self-efficacy | | 19  19 | 12 | **1.11*** | .15 | 2.06 | 5 | Individual  Individual | Phone  Phone |  | [21]  [21] |
| 24 | .70 | -.22 | 1.62 | 3 |  |
| Health Promoting Lifestyle Profile II | Health responsibility | 51 | 4 | **.61*** | .06 | 1.17 | 2 | Group | Face |  | [19] |
| Confidence in Behaviour Change | | 71 | 10 | -.41 | -.87 | .06 | 1 | Individual | Phone |  | [32] |
|  |  |  |  |  |  |  |  |  |  |  |  |  |
| Coping | Health Promoting Lifestyle Profile II | Stress management | 51  51 | 4  4 | **.65*** | .09 | 1.20 | 2 | Group  Group | Face  Face |  | [19]  [19] |
| Spiritual growth | .47 | -.08 | 1.02 | 1 |  |
|  |  |  |  |  |  |  |  |  |  |  |  |  |
| Relationships | Health Promoting Lifestyle Profile II | Interpersonal | 51 | 4 | **.60*** | .05 | 1.15 | 2 | Group | Face |  | [19] |
|  |  |  |  |  |  |  |  |  |  |  |  |  |
| Cognition | Behaviour Rating Inventory of Executive Function | Executive function | 119 | 28 | .15 | -.21 | .50 | 0 | Individual | Face + Phone |  | [20] |
| Metacognition index | 119 | 28 | .05 | -.31 | .40 | 0 | Individual | Face + Phone |  | [20] |
|  |  | |  |  |  |  |  |  |  |  |  |  |
| Treatment engagement | Re-initiation of disease modifying therapies  Medication Adherence  Healthcare Engagement | | 71 | 10 | .45 | -.01 | .92 | 1 | Individual | Phone |  | [32] |
| 19 | 12 | .36 | -.54 | 1.25 | 1 | Individual | Phone |  | [21] |
| 19 | 24 | .61 | -.30 | 1.52 | 2 | Individual | Phone |  | [21] |
| 71 | 10 | 17 | -.38 | .73 | 0 | Individual | Phone |  | [32] |
|  |  |  |  |  |  |  |  |  |  |  |  |  |  |
| Global | Health Promoting Lifestyle Profile II | Total | 51 | 4 | **.81*** | .25 | 1.37 | 3 | Group | Face |  | [19] |  |
|  | Multiple Sclerosis Impact Scale-29 | Psychological | 119 | 28 | **.41*** | .05 | .77 | 1 | Individual | Face + Phone |  | [20] |
|  |  |  |  |  |  |  |  |  |  |  |  |  |

N= number of participants providing this data; Time = assessment time point (in weeks), *g* = standardised mean difference (Hedges’ g),CI = 95% confidence interval (lower and upper limits), N*fs* = fail safe N.

* denotes a significant group difference (*p* < .05). Positive values indicate greater gains (improvement) in motivational interviewing group.
